# Supplementary material
Source: Springer Nature journal article supplement (https://www.springermedizin.de/resource/supplementary/13017_2008_100_MOESM1_ESM.pdf/9635470)
Supplement: MOESM1 [file 9635470]

*Stage*

*Examination*

*Performed by*

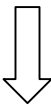

**STAGE I**

*Clinical Examination*

**Surgeon on call**

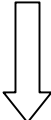

Suspected diagnosis (Probability scale 0% -100%)

↗ Conservative treatment

↘ Operative treatment

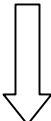

**STAGE II**

*Sonography*

**US Examiner**

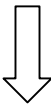

**STAGE III**

*Clinical examination*  
+  
*Sonography*  
-> *Working diagnosis*

**Surgeon on call**

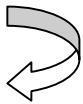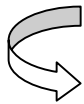

**Affirmation** of the initial  
diagnosis and treatment  
in Step I (Probability scale 0% -100%)

**Change** of the initial  
diagnosis and treatment  
in Step I (Probability scale 0% -100%)

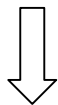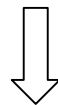

**STAGE IV**

Affirmation of the  
diagnosis

Affirmation of the  
diagnosis
